# Supplementary material for: Processing of Enriched Pear Slices with Blueberry Juice: Phenolics, Antioxidant, and Color Characteristics
Source: MDPI journal article supplement (doi:10.3390/antiox12071408), 2023-07-11
Supplement: s1 [file s1]

**Table S3:** Vacuum impregnation assisted by ohmic heating kinetics of pear slices enriched with blueberry juice throughout 180 min at 30, 40, and 50 °C on total phenolic content (TPC), total flavonoid content (TFC), and total monomeric anthocyanins (TMA).

| Time (min)       | TPC (mg GAE.100 g <sup>-1</sup> dry matter) |                                |                               | TFC (mg CE.100 g <sup>-1</sup> dry matter) |                              |                               | TMA (µg C3G.100 g <sup>-1</sup> dry matter) |                                |                                |
|------------------|---------------------------------------------|--------------------------------|-------------------------------|--------------------------------------------|------------------------------|-------------------------------|---------------------------------------------|--------------------------------|--------------------------------|
|                  | 30 °C                                       | 40 °C                          | 50 °C                         | 30 °C                                      | 40 °C                        | 50 °C                         | 30 °C                                       | 40 °C                          | 50 °C                          |
| Non-treated pear | 196.33 ± 4.43 <sup>e,A</sup>                | 196.33 ± 4.43 <sup>d,A</sup>   | 196.33 ± 4.43 <sup>d,A</sup>  | 47.71 ± 0.49 <sup>e,A</sup>                | 47.71 ± 0.49 <sup>de,A</sup> | 47.71 ± 0.49 <sup>c,A</sup>   | -                                           | -                              | -                              |
| 5                | 189.75 ± 5.78 <sup>de,B</sup>               | 162.90 ± 0.17 <sup>bc,A</sup>  | 152.07 ± 6.07 <sup>a,A</sup>  | 17.07 ± 0.31 <sup>a,A</sup>                | 29.16 ± 0.46 <sup>a,B</sup>  | 29.75 ± 0.80 <sup>a,B</sup>   | 129.13 ± 1.89 <sup>a,A</sup>                | 261.40 ± 3.01 <sup>a,B</sup>   | 125.25 ± 1.17 <sup>a,A</sup>   |
| 10               | 141.78 ± 3.57 <sup>a,A</sup>                | 151.32 ± 2.97 <sup>a,B</sup>   | 160.44 ± 0.54 <sup>ab,C</sup> | 19.46 ± 0.14 <sup>a,A</sup>                | 33.50 ± 1.57 <sup>b,B</sup>  | 36.02 ± 0.43 <sup>ab,B</sup>  | 197.08 ± 2.10 <sup>b,A</sup>                | 309.66 ± 4.71 <sup>a,C</sup>   | 246.16 ± 8.46 <sup>b,B</sup>   |
| 15               | 150.37 ± 5.17 <sup>a,A</sup>                | 147.02 ± 3.71 <sup>a,A</sup>   | 172.04 ± 4.88 <sup>bc,B</sup> | 23.50 ± 0.92 <sup>b,A</sup>                | 32.48 ± 1.40 <sup>b,B</sup>  | 39.05 ± 1.35 <sup>b,C</sup>   | 204.19 ± 2.35 <sup>b,A</sup>                | 517.93 ± 9.09 <sup>b,C</sup>   | 389.26 ± 5.10 <sup>c,B</sup>   |
| 20               | 177.22 ± 7.54 <sup>bc,B</sup>               | 155.72 ± 7.41 <sup>ab,A</sup>  | 175.90 ± 5.66 <sup>c,B</sup>  | 36.50 ± 0.99 <sup>c,A</sup>                | 38.59 ± 0.43 <sup>c,A</sup>  | 55.81 ± 1.11 <sup>d,B</sup>   | 263.42 ± 4.42 <sup>c,A</sup>                | 637.35 ± 24.62 <sup>c,C</sup>  | 431.28 ± 3.87 <sup>c,B</sup>   |
| 25               | 182.81 ± 7.20 <sup>cd,B</sup>               | 169.27 ± 1.17 <sup>c,A</sup>   | 181.43 ± 7.22 <sup>c,AB</sup> | 42.80 ± 0.86 <sup>d,A</sup>                | 43.96 ± 1.68 <sup>d,A</sup>  | 73.19 ± 0.30 <sup>e,B</sup>   | 331.92 ± 13.10 <sup>d,A</sup>               | 900.09 ± 21.87 <sup>d,C</sup>  | 670.49 ± 14.09 <sup>d,B</sup>  |
| 30               | 187.72 ± 6.55 <sup>de,A</sup>               | 195.83 ± 3.09 <sup>d,A</sup>   | 184.15 ± 2.72 <sup>c,A</sup>  | 43.12 ± 1.57 <sup>d,A</sup>                | 50.06 ± 1.62 <sup>ef,B</sup> | 90.78 ± 3.39 <sup>f,C</sup>   | 395.71 ± 18.49 <sup>e,A</sup>               | 1200.95 ± 13.30 <sup>e,B</sup> | 1186.81 ± 38.64 <sup>e,B</sup> |
| 45               | 171.00 ± 2.27 <sup>b,A</sup>                | 208.76 ± 2.37 <sup>e,B</sup>   | 218.34 ± 7.75 <sup>e,B</sup>  | 47.99 ± 1.86 <sup>e,A</sup>                | 53.06 ± 1.77 <sup>f,A</sup>  | 136.99 ± 3.07 <sup>g,B</sup>  | 439.69 ± 7.42 <sup>f,A</sup>                | 1282.06 ± 16.85 <sup>f,B</sup> | 2264.71 ± 64.01 <sup>f,C</sup> |
| 60               | 176.15 ± 0.98 <sup>bc,A</sup>               | 192.95 ± 2.46 <sup>d,B</sup>   | 351.81 ± 0.90 <sup>f,C</sup>  | 59.90 ± 1.52 <sup>f,A</sup>                | 90.48 ± 4.28 <sup>g,B</sup>  | 167.48 ± 4.42 <sup>h,C</sup>  | 735.81 ± 22.86 <sup>g,A</sup>               | 1209.87 ± 42.12 <sup>e,B</sup> | 2665.47 ± 10.18 <sup>i,C</sup> |
| 75               | 257.96 ± 5.45 <sup>g,B</sup>                | 231.35 ± 5.85 <sup>f,A</sup>   | 349.79 ± 6.34 <sup>f,C</sup>  | 71.24 ± 2.16 <sup>g,A</sup>                | 113.43 ± 1.03 <sup>h,B</sup> | 164.64 ± 5.86 <sup>h,C</sup>  | 924.64 ± 32.67 <sup>h,A</sup>               | 1576.31 ± 36.70 <sup>g,B</sup> | 2401.34 ± 63.14 <sup>g,C</sup> |
| 90               | 253.47 ± 1.67 <sup>g,A</sup>                | 239.07 ± 10.91 <sup>fg,A</sup> | 398.03 ± 8.97 <sup>i,B</sup>  | 101.38 ± 3.33 <sup>h,A</sup>               | 134.79 ± 2.56 <sup>i,B</sup> | 182.62 ± 4.81 <sup>j,C</sup>  | 1194.36 ± 31.66 <sup>k,A</sup>              | 2282.22 ± 84.48 <sup>i,B</sup> | 2489.15 ± 58.84 <sup>h,C</sup> |
| 120              | 193.14 ± 3.93 <sup>e,A</sup>                | 248.24 ± 6.26 <sup>g,B</sup>   | 365.48 ± 7.35 <sup>g,C</sup>  | 98.25 ± 1.67 <sup>h,A</sup>                | 129.80 ± 3.01 <sup>i,B</sup> | 175.20 ± 6.29 <sup>i,C</sup>  | 1116.66 ± 42.45 <sup>j,A</sup>              | 2035.41 ± 35.59 <sup>h,B</sup> | 2605.87 ± 84.35 <sup>i,C</sup> |
| 180              | 205.97 ± 2.91 <sup>f,A</sup>                | 240.66 ± 8.92 <sup>fg,B</sup>  | 378.62 ± 9.65 <sup>h,C</sup>  | 106.66 ± 2.83 <sup>i,A</sup>               | 154.56 ± 1.57 <sup>k,B</sup> | 177.52 ± 5.10 <sup>ij,C</sup> | 1004.72 ± 38.62 <sup>i,A</sup>              | 2587.58 ± 29.52 <sup>j,B</sup> | 3258.69 ± 58.02 <sup>j,C</sup> |

Results are presented as mean ± standard deviation. GAE – gallic acid equivalent. CE – catechin equivalent. C3G – cyanidin 3-glucoside equivalent. (-) not applicable. <sup>a-k</sup> Different lowercase letters in the same column indicate statistical difference ( $p \leq 0.05$ ) according to the LSD test. <sup>A-C</sup> Different capital letters in the same row for each assay, indicate statistical difference ( $p \leq 0.05$ ) according to the LSD test.
