# Supplementary material for: Processing of Enriched Pear Slices with Blueberry Juice: Phenolics, Antioxidant, and Color Characteristics
Source: MDPI journal article supplement (doi:10.3390/antiox12071408), 2023-07-11
Supplement: s1 [file s1]

**Table S4:** Vacuum impregnation assisted by ohmic heating kinetics of pear slices enriched with blueberry juice throughout 180 min at 30, 40, and 50 °C on antioxidant capacity ( $\mu\text{mol TE} \cdot 100 \text{ g}^{-1}$  dry matter).

| Time<br>(min)    | DPPH                               |                                    |                                    | FRAP                               |                                    |                                    |
|------------------|------------------------------------|------------------------------------|------------------------------------|------------------------------------|------------------------------------|------------------------------------|
|                  | 30 °C                              | 40 °C                              | 50 °C                              | 30 °C                              | 40 °C                              | 50 °C                              |
| Non-treated pear | 630.53 $\pm$ 3.62 <sup>c,A</sup>   | 630.53 $\pm$ 3.62 <sup>d,A</sup>   | 630.53 $\pm$ 3.62 <sup>c,A</sup>   | 619.54 $\pm$ 11.53 <sup>e,A</sup>  | 619.54 $\pm$ 11.53 <sup>f,A</sup>  | 619.54 $\pm$ 11.53 <sup>d,A</sup>  |
| 5                | 534.67 $\pm$ 6.54 <sup>a,C</sup>   | 471.35 $\pm$ 3.56 <sup>a,B</sup>   | 454.74 $\pm$ 9.53 <sup>a,A</sup>   | 402.42 $\pm$ 5.35 <sup>a,B</sup>   | 371.43 $\pm$ 7.45 <sup>a,A</sup>   | 401.76 $\pm$ 5.23 <sup>a,B</sup>   |
| 10               | 521.24 $\pm$ 11.25 <sup>a,B</sup>  | 478.74 $\pm$ 18.54 <sup>ab,A</sup> | 476.35 $\pm$ 20.64 <sup>a,A</sup>  | 402.73 $\pm$ 3.73 <sup>a,A</sup>   | 407.53 $\pm$ 3.84 <sup>b,A</sup>   | 443.24 $\pm$ 11.23 <sup>b,B</sup>  |
| 15               | 549.42 $\pm$ 7.63 <sup>a,B</sup>   | 499.35 $\pm$ 10.45 <sup>ab,A</sup> | 576.19 $\pm$ 18.45 <sup>b,C</sup>  | 416.35 $\pm$ 16.53 <sup>ab,A</sup> | 427.54 $\pm$ 3.35 <sup>bc,A</sup>  | 535.74 $\pm$ 2.34 <sup>c,B</sup>   |
| 20               | 545.56 $\pm$ 19.54 <sup>a,AB</sup> | 515.74 $\pm$ 13.45 <sup>bc,A</sup> | 553.24 $\pm$ 15.74 <sup>b,B</sup>  | 432.74 $\pm$ 5.63 <sup>b,A</sup>   | 447.45 $\pm$ 12.64 <sup>c,A</sup>  | 794.05 $\pm$ 11.35 <sup>e,B</sup>  |
| 25               | 584.86 $\pm$ 22.74 <sup>b,B</sup>  | 548.73 $\pm$ 6.63 <sup>c,A</sup>   | 624.74 $\pm$ 20.02 <sup>c,C</sup>  | 435.63 $\pm$ 10.63 <sup>bc,A</sup> | 488.24 $\pm$ 11.35 <sup>d,B</sup>  | 833.34 $\pm$ 5.36 <sup>f,C</sup>   |
| 30               | 617.92 $\pm$ 21.34 <sup>bc,A</sup> | 656.43 $\pm$ 19.45 <sup>d,A</sup>  | 730.93 $\pm$ 21.03 <sup>d,B</sup>  | 456.23 $\pm$ 11.73 <sup>c,A</sup>  | 561.63 $\pm$ 17.36 <sup>e,B</sup>  | 994.56 $\pm$ 10.64 <sup>g,C</sup>  |
| 45               | 644.23 $\pm$ 26.75 <sup>c,A</sup>  | 718.03 $\pm$ 4.73 <sup>e,B</sup>   | 987.93 $\pm$ 12.64 <sup>e,C</sup>  | 499.92 $\pm$ 7.34 <sup>d,A</sup>   | 702.02 $\pm$ 27.74 <sup>h,B</sup>  | 1111.82 $\pm$ 35.54 <sup>h,C</sup> |
| 60               | 638.73 $\pm$ 29.42 <sup>c,A</sup>  | 750.82 $\pm$ 25.34 <sup>e,B</sup>  | 974.55 $\pm$ 7.95 <sup>e,C</sup>   | 615.03 $\pm$ 11.03 <sup>e,A</sup>  | 663.06 $\pm$ 9.34 <sup>g,A</sup>   | 1377.45 $\pm$ 30.63 <sup>k,B</sup> |
| 75               | 746.35 $\pm$ 11.02 <sup>d,A</sup>  | 903.35 $\pm$ 18.12 <sup>f,B</sup>  | 998.63 $\pm$ 12.64 <sup>e,C</sup>  | 781.53 $\pm$ 19.85 <sup>h,B</sup>  | 702.34 $\pm$ 24.53 <sup>h,A</sup>  | 1222.34 $\pm$ 16.35 <sup>i,C</sup> |
| 90               | 747.93 $\pm$ 3.24 <sup>d,A</sup>   | 952.30 $\pm$ 3.63 <sup>g,B</sup>   | 1061.83 $\pm$ 6.63 <sup>f,C</sup>  | 741.46 $\pm$ 2.39 <sup>g,A</sup>   | 886.66 $\pm$ 28.13 <sup>i,B</sup>  | 1278.64 $\pm$ 24.35 <sup>i,C</sup> |
| 120              | 756.82 $\pm$ 10.86 <sup>d,A</sup>  | 1046.26 $\pm$ 30.20 <sup>h,B</sup> | 1044.92 $\pm$ 22.73 <sup>f,B</sup> | 672.14 $\pm$ 5.98 <sup>f,A</sup>   | 743.25 $\pm$ 6.84 <sup>i,B</sup>   | 1204.35 $\pm$ 5.63 <sup>i,C</sup>  |
| 180              | 755.64 $\pm$ 36.92 <sup>d,A</sup>  | 1197.11 $\pm$ 58.64 <sup>i,B</sup> | 1109.44 $\pm$ 19.46 <sup>g,B</sup> | 813.63 $\pm$ 26.34 <sup>i,A</sup>  | 1124.45 $\pm$ 32.35 <sup>k,B</sup> | 1278.34 $\pm$ 13.36 <sup>j,C</sup> |

Results are presented as mean  $\pm$  standard deviation. DPPH – 2,2-diphenyl-1-picrylhydrazyl. FRAP – ferric reducing antioxidant power. TE – Trolox equivalent. <sup>a-k</sup> Different lowercase letters in the same column indicate statistical difference ( $p \leq 0.05$ ) according to the LSD test. <sup>A-C</sup> Different capital letters in the same row for each assay, indicate statistical difference ( $p \leq 0.05$ ) according to the LSD test.
