# Supplementary material for: Processing of Enriched Pear Slices with Blueberry Juice: Phenolics, Antioxidant, and Color Characteristics
Source: MDPI journal article supplement (doi:10.3390/antiox12071408), 2023-07-11
Supplement: s1 [file s1]

**Table S2:** Total bioactive compounds and antioxidant capacity of blueberry juice treated by ohmic heating throughout 20 min at 30, 40, and 50 °C.

| Temperature (°C)  | Time (min) | TPC<br>(mg GAE.100 mL <sup>-1</sup> ) | TFC<br>(mg CE.100 mL <sup>-1</sup> ) | TMA<br>(µg C3G.100 mL <sup>-1</sup> ) | Antioxidant capacity                    |                                         |
|-------------------|------------|---------------------------------------|--------------------------------------|---------------------------------------|-----------------------------------------|-----------------------------------------|
|                   |            |                                       |                                      |                                       | DPPH<br>(µmol TE.100 mL <sup>-1</sup> ) | FRAP<br>(µmol TE.100 mL <sup>-1</sup> ) |
| Non-treated juice |            | 152.00 ± 3.14 <sup>a</sup>            | 90.93 ± 0.50 <sup>a</sup>            | 354.03 ± 9.23 <sup>a</sup>            | 327.94 ± 5.54 <sup>a</sup>              | 403.84 ± 0.84 <sup>a</sup>              |
| 30                | 5          | 156.54 ± 3.27 <sup>ab</sup>           | 97.45 ± 1.09 <sup>b</sup>            | 473.15 ± 9.64 <sup>b</sup>            | 343.77 ± 5.02 <sup>b</sup>              | 403.24 ± 2.80 <sup>a</sup>              |
|                   | 10         | 161.69 ± 4.48 <sup>b</sup>            | 96.98 ± 3.76 <sup>b</sup>            | 642.35 ± 11.23 <sup>d</sup>           | 371.00 ± 7.94 <sup>c</sup>              | 409.77 ± 1.66 <sup>ab</sup>             |
|                   | 15         | 174.12 ± 2.28 <sup>cd</sup>           | 124.49 ± 0.41 <sup>e</sup>           | 1074.72 ± 19.42 <sup>hi</sup>         | 419.88 ± 3.15 <sup>e</sup>              | 428.97 ± 7.40 <sup>c</sup>              |
|                   | 20         | 188.97 ± 6.44 <sup>f</sup>            | 134.46 ± 1.64 <sup>g</sup>           | 1219.04 ± 23.26 <sup>i</sup>          | 430.16 ± 2.35 <sup>e</sup>              | 464.97 ± 7.52 <sup>e</sup>              |
| 40                | 5          | 175.93 ± 2.28 <sup>cd</sup>           | 110.02 ± 1.64 <sup>c</sup>           | 512.53 ± 19.26 <sup>c</sup>           | 335.16 ± 9.46 <sup>ab</sup>             | 425.04 ± 7.07 <sup>bc</sup>             |
|                   | 10         | 178.36 ± 1.28 <sup>de</sup>           | 118.09 ± 2.49 <sup>d</sup>           | 826.34 ± 11.53 <sup>e</sup>           | 365.44 ± 7.51 <sup>c</sup>              | 430.84 ± 8.00 <sup>c</sup>              |
|                   | 15         | 179.27 ± 2.57 <sup>de</sup>           | 122.83 ± 2.05 <sup>e</sup>           | 1024.12 ± 34.24 <sup>g</sup>          | 366.27 ± 5.91 <sup>c</sup>              | 438.17 ± 9.38 <sup>cd</sup>             |
|                   | 20         | 182.30 ± 2.28 <sup>e</sup>            | 136.59 ± 1.48 <sup>gh</sup>          | 1085.53 ± 16.13 <sup>i</sup>          | 382.11 ± 9.14 <sup>d</sup>              | 449.10 ± 9.20 <sup>de</sup>             |
| 50                | 5          | 170.78 ± 2.09 <sup>c</sup>            | 118.32 ± 3.96 <sup>d</sup>           | 442.53 ± 11.53 <sup>b</sup>           | 330.72 ± 4.73 <sup>a</sup>              | 428.04 ± 15.95 <sup>c</sup>             |
|                   | 10         | 172.90 ± 0.90 <sup>cd</sup>           | 129.71 ± 1.06 <sup>f</sup>           | 969.23 ± 28.24 <sup>f</sup>           | 361.83 ± 9.27 <sup>c</sup>              | 448.44 ± 19.06 <sup>de</sup>            |
|                   | 15         | 195.03 ± 6.05 <sup>g</sup>            | 148.57 ± 0.50 <sup>i</sup>           | 1040.42 ± 19.53 <sup>gh</sup>         | 392.38 ± 4.88 <sup>d</sup>              | 519.10 ± 12.23 <sup>f</sup>             |
|                   | 20         | 201.09 ± 1.57 <sup>h</sup>            | 139.43 ± 1.48 <sup>h</sup>           | 1035.14 ± 16.35 <sup>g</sup>          | 427.11 ± 2.09 <sup>e</sup>              | 562.24 ± 3.67 <sup>g</sup>              |

Results are presented as mean ± standard deviation. TPC – total phenolic content. TFC – total flavonoid content. TMA – total monomeric anthocyanins. DPPH – 2,2-diphenyl-1-picrylhydrazyl. FRAP – ferric reducing antioxidant power. GAE – gallic acid equivalent. CE – catechin equivalent. C3G – cyanidin 3-glucoside equivalent. TE – Trolox equivalent.

<sup>a-i</sup> Different lowercase letters in the same column indicate statistical difference ( $p \leq 0.05$ ) according to the LSD test.
